# Supplementary material for: Rotundic acid improves nonalcoholic steatohepatitis in mice by regulating glycolysis and the TLR4/AP1 signaling pathway
Source: Springer Nature journal article supplement (doi:10.1186/s12944-023-01976-z), 2023-12-04
Supplement: MOESM10 [file 12944_2023_1976_MOESM10_ESM.pdf]

# Rotundic acid improves nonalcoholic steatohepatitis in mice by regulating glycolysis and the TLR4/AP1 signaling pathway

*By xingyang shi*

1 Rotundic acid improves nonalcoholic steatohepatitis in mice by regulating  
2 glycolysis and the TLR4/AP1 signaling pathway

### 3 **ABSTRACT**

4 **Background:** Steatosis and inflammation are the hallmarks of  
5 nonalcoholic steatohepatitis (NASH). Rotundic acid (RA) is among the key  
6 triterpenes of *Ilicis Rotundae* Cortex and has exhibited multipronged effects in  
7 terms of lowering the lipid content and alleviating inflammation. The study  
8 objective is to systematically evaluate the potential mechanisms through  
9 which RA affects the development and progression of NASH.

10 **Methods:** Transcriptomic and proteomic analyses of primary hepatocytes  
11 isolated from the control, high-fat diet-induced NASH, and RA treatment  
12 groups were performed through Gene Ontology analysis and pathway  
13 enrichment. Hub genes were identified through network analysis. Integrative  
14 analysis revealed key RA-regulated pathways, which were verified by gene  
15 and protein expression studies and cell assays.

16 **Results:** Hub genes were identified and enriched in the Toll-like receptor  
17 4 (TLR4)/activator protein-1 (AP1) signaling pathway and glycolysis pathway.  
18 RA reversed glycolysis and attenuated the TLR4/AP1 pathway, thereby  
19 reducing lipid accumulation and inflammation. Additionally, lactate release in  
20 L-02 cells increased with NaAsO<sub>2</sub>-treated and significantly decreased with RA  
21 treatment, thus revealing that RA had a major impact on glycolysis.

1       **Conclusions:** RA is effective in lowering the lipid content and reducing  
2 inflammation in mice with NASH by ameliorating glycolysis and TLR4/AP1  
3 pathways, contributing to the existing knowledge and potentially shedding  
4 light on the development of therapeutic interventions for patients with NASH.

5       **Keywords:** NASH; RA; glycolysis; TLR4/AP1; proteomics; transcriptomics

## 6       **Introduction**

7 Nonalcoholic fatty liver disease (NAFLD) is a growing worldwide health  
8 concern and a significant trigger for liver and cardiometabolic diseases [1].  
9 Nonalcoholic steatohepatitis (NASH) is among the more aggressive forms of  
10 disease progression in NAFLD. This condition is distinguished by steatosis,  
11 inflammation, and cellular damage and may further lead to hepatic fibrosis,  
12 cirrhosis, and hepatocellular carcinoma [2, 3]. Currently, US FDA-approved  
13 drugs or biological treatments are lacking [4, 5]. To date, obeticholic acid, a  
14 farnesoid X receptor agonist, is the only drug granted breakthrough status by  
15 the US FDA. However, this drug can cause dyslipidaemia, and its launch has  
16 been delayed. Therefore, research to identify new drugs for NASH is urgently  
17 needed.

18       The pathogenesis of NASH involves a complex interaction among  
19 systemic metabolic disorders (e.g., obesity), environmental factors (e.g., diet)  
20 [6, 7] and predisposing genetic variants (e.g., transmembrane 6 superfamily  
21 member 2) [8, 9], resulting in disturbed glucose and lipid homeostasis and an

1 inordinate accumulation of lipids in hepatocytes. Among these interacting  
2 components, the glycolytic pathway is a key regulatory point [10]. Glycolysis is  
3 markedly enhanced in hepatocytes in fatty liver, being the cause of  
4 strengthened *de novo* lipogenesis (DNL) and increased liver inflammation.  
5 NASH is an inflammatory process involving the activation of inflammatory  
6 signaling pathways and immune cell recruitment. Recent research has  
7 revealed a connection between fatty acid metabolism and immunity,  
8 specifically through Toll-like receptor 4 (TLR4) [11].

9 Ilicis Rotundae Cortex (IRC), a traditional Chinese medicine, is the  
10 dehydrated bark of *Ilex rotunda* Thunb. (*I. rotunda*). This medicine is widely  
11 used to treat cardiovascular diseases and hepatitis [12]. Triterpenoids are  
12 considered active ingredients of IRC [13]. Among triterpenoids, rotundic acid  
13 (RA) is one of the key triterpenes that found in abundance in IRC [14, 15]. RA  
14 has exhibited multipronged effects in terms of hepatoprotection, improving  
15 lipid metabolism, and alleviating inflammation [16-18]. An early research has  
16 revealed that RA decreases the triglyceride and total cholesterol contents in  
17 the NASH model and reduces the protein and gene expression levels of  
18 inflammatory factors [16]. However, only lipid metabolism has been explored.  
19 Hence, a more detailed mechanism of the effect of RA on NASH needs to be  
20 explored systematically by *in vivo* studies.

21 The study elucidated the potential mechanisms by which RA affects the  
22 development and progression of NASH and investigated the effects of RA on

glycolysis and the TLR4/activator protein 1 (AP1) pathway in primary liver cells, providing a development for therapeutic interventions for NASH.

### **Materials and methods**

#### **Chemicals and reagents**

RA was supplied by the preliminary laboratory (purity: 98.7%) (refer to Supplementary File 1 and Supplementary Figs. 1 and 2 for details) [19]. Anti-cyclophilin B (CYPB) (DF12151), anti-phospho-c-Fos (AF3053), anti-hexokinase 2 (HK2) (DF6176), anti-c-Jun (AF6090), anti-pyruvate kinase 2 (PKM2) (DF6071), and anti-phospho-c-Jun (AF3095) antibodies were provided by Affinity Co. (Nanjing, Jiangsu, China). <sup>36</sup>Anti-myeloid differentiation primary response gene 88 (MyD88) (A19082), anti-phosphofructokinase (PFKL) (A7708), anti-carbohydrate-responsive element-binding protein (ChREBP) (A7630), anti-Toll-like receptor 4 (TLR4) (A17436), and anti-c-Fos were provided by ABclonal Technology Co. (Wuhan, Hubei, China). 1× TBST buffer was used to dilute every antibody used in the investigation.

#### **Isolation of primary liver cells**

Animal experiments were conducted in the early research [16] (refer to Fig. 1 and Supplementary File 1 for details).

At the end of these experiments, the animals were anesthetized with pentobarbital sodium solution (5 mg/100 g), and primary liver cells were

1 collected. Two steps of collagenase perfusion were performed [20-22]. Hanks  
2 Balanced Salt Solution was first used to perfuse the liver until no blood was  
3 flushed out of the liver. Then, EGTA was poured at a 15 mL/min rate. For  
4 digestion of the liver tissues, collagenase medium containing DMEM, 1 g/L  
5 glucose, and 100 units/mL collagenase IV was perfused into the liver. The  
6 liver was gently scraped with a scalpel to release hepatocytes into the  
7 medium. A 75- $\mu$ m pore size filter was used to filter the hepatocyte  
8 homogenate, and gradient centrifugation was performed to separate viable  
9 hepatocytes.

10 The culture medium was used to wash the hepatocytes, Kupffer cells,  
11 and hepatic stellate cells. The trypan blue (0.04% in incubation buffer)  
12 exclusion method was employed to assess cell viability. Primary hepatocytes  
13 were used for further proteomics and transcriptomics analyses.

14

15 **Fig. 1** A schematic diagram of the animal experiments.

## 16 **Transcriptomics**

17 Total RNA from the primary hepatocytes was acquired by using the <sup>19</sup>RNAprep  
18 Pure Cell/Bacteria Kit (TIANGEN Biotech, Beijing, China). Conducting and  
19 sequencing of a complementary DNA (cDNA) library was carried out by BGI-  
20 Shenzhen (Shenzhen, Guangdong, China). Raw data were filtered using the  
21 software SOAPnuke independently developed by BGI-Shenzhen (Shenzhen,  
22 Guangdong, China). For aligning clean reads to the gene set and reference

1 genome, the sequence alignment software HISAT was used, such that gene  
2 or transcript expression in the sample can be quantified. Significantly  
3 differentially expressed genes (DEGs) were those <sup>11</sup> with a false discovery rate  
4 (FDR) of  $\leq 0.001$  and a fold change of  $\geq 1.5$ .

## 5 **Proteomics**

6 Primary hepatocytes were dissolved in a 1× cocktail (containing 1% SDS, 2  
7 mM EDTA, and 10 mM DTT). All samples were quantified, reduced, alkylated,  
8 trypsin-digested, and desalted.

9 The desalted samples were subjected to high pH RP separation by using  
10 the Shimadzu LC-20AB HPLC system and analyzed <sup>12</sup> via a Q Exactive HF  
11 mass spectrometer with <sup>1</sup> an Ultimate 3000 RSLCnano system (Thermo Fisher  
12 Scientific, San Jose, CA, USA). <sup>3</sup> Data-dependent acquisition (DDA) and data-  
13 independent acquisition (DIA) were carried out by BGI-Shenzhen (Shenzhen,  
14 Guangdong, China).

15 A spectral library was constructed by identifying DDA data <sup>23</sup> in MaxQuant  
16 (version 1.5.3.30) via the Andromeda search engine and then analyzing these  
17 identified data in Spectronaut [23]. A spectral library of identified peptides  
18 satisfying FDR  $\leq 1\%$  was constructed. The DIA data were quantitatively  
19 analyzed using Spectronaut to obtain significant results with FDR  $\leq 1\%$  [24].  
20 The process involved data preprocessing by MSstats dependent on the  
21 predefined comparison group, and then, the significance test was conducted

1 on the basis of the model [25]. Subsequently, significantly differentially  
2 expressed proteins (DEPs) were defined as those with a fold change  $\geq 1.5$ .

### 3 **Bioinformatics analysis**

4 All candidate genes were classified into Gene Ontology (GO) database  
5 entries, and the gene counts per entry were calculated. After the candidate  
6 genes were compared to the background genes of *Mus musculus*, a  
7 hypergeometric test was conducted to find significant enrichment of GO  
8 functions. The P value was calculated by employing the basis function phyper  
9 of R, which was then corrected by multiple testing. The corrected package is  
10 known as the Q value. Finally, a Q value of  $\leq 0.05$  was used as the cut-off  
11 value. GO terms that satisfied this parameter were considered to be markedly  
12 enriched in candidate genes.

13 Pathway enrichment analysis was carried out using the same  
14 aforementioned method by utilizing the KEGG <sup>31</sup> (Kyoto Encyclopedia of Genes  
15 and Genomes) pathway database.

16 Following the KEGG <sup>22</sup> enrichment analysis, the protein-protein interaction  
17 (PPI) network was constructed using STRING [26]. As a criterion of statistical  
18 significance, the interaction score with the highest confidence (0.900) was  
19 considered the minimum requirement. The PPI network was imported into  
20 Cytoscape (version 3.9.0), and hub genes were explored by the CytoHubba  
21 plugin app. DEGs and DEPs identified through the aforementioned method



1 were mapped to the KEGG pathway by using the Pathview website [27].

2 **Quantitative real-time polymerase chain reaction (qPCR) analysis**

3 The total RNA of primary liver cells was utilized to synthesize cDNA using  
4 TIANScript II RT Kit (TIANGEN Biotech, Beijing, China). For qPCR, TB Green  
5 Fast qPCR Mix (TaKaRa, Tokyo, Japan) was used and was performed on a  
6 LightCycler 96 System (Roche Diagnostics, Mannheim, BW, Germany) and a  
7 Applied Biosystems 7300 Real-Time PCR System (Thermo Fisher Scientific,  
8 Waltham, MA, USA). CYPB was considered the reference gene, and target  
9 genes were determined using the  $2^{-\Delta\Delta C_t}$  method. Table 1 enlists the primer  
10 sequences.

11 **Table 1.** Sequences of the primers

| Gene   | Primers | Sequences (5' to 3')   |
|--------|---------|------------------------|
| HK2    | Forward | GAGAAAGCTCAGCATCGTGG   |
|        | Reverse | TCCATTGTACTCCGTGGCT    |
| PFKFB3 | Forward | CGAGATCGATGCTGGTGTGT   |
|        | Reverse | CTCCAGGCGTTGGACAAGAT   |
| PKM2   | Forward | GGCTCCTATCATTGCCGTGA   |
|        | Reverse | AAGGTACAGGCACTACACGC   |
| PFKL   | Forward | CGCTGCAATGGAGAGTTGTG   |
|        | Reverse | CCTCAAAGACGTAGGCAGCA   |
| ENO1   | Forward | CGCGTCTGTCCTTAAGGCTCTC |
|        | Reverse | GCGGTGTACAGATCGACCTCA  |
| LDHA   | Forward | GGACAGTGCCTACGAGGTGAT  |
|        | Reverse | GGATGCACCCGCCTAAGG     |

|        |         |                          |
|--------|---------|--------------------------|
| ChREBP | Forward | TGCCATCAACTTGTGCCAGC     |
|        | Reverse | TGCGGTAGACACCATCCCAT     |
| MLX    | Forward | CACAAGGAGAAGAAAAAGCAGGAG |
|        | Reverse | AATCTCTCGTAGAGTCTGTGGC   |
| TLR4   | Forward | TCTGGGGAGGCACATCTTCT     |
|        | Reverse | AGGTCCAAGTTGCCGTTTCT     |
| MyD88  | Forward | AACGCCGGAACCTTTTCGATG    |
|        | Reverse | TTCTGTTGGACACCTGGAGA     |
| c-JUN  | Forward | AAAACCTTGAAAGCGCAAAA     |
|        | Reverse | CGCAACCAGTCAAGTTCTCA     |
| c-FOS  | Forward | GGGGACAGCCTTTCCTACTA     |
|        | Reverse | TGGGGATAAAGTTGGCACTA     |
| CYPB   | Forward | TTCTTCATAACCACAGTCAAGACC |
|        | Reverse | ACCTTCCGTACCACATCCAT     |

## 1 Western blotting

2 <sup>32</sup> Proteins were separated on a 12% SDS-PAGE gel and detected on  
 3 <sup>6</sup> polyvinylidene difluoride membranes (Bio-Rad, Hercules, CA, USA). First,  
 4 non-fat dry milk/TBST buffer (3%) was utilized to block the membranes, then  
 5 primary antibodies were kept with the membrane at 4°C with gentle shaking  
 6 overnight, followed by <sup>34</sup> 1 h treatment with corresponding secondary antibodies  
 7 at ambient temperature. Bands were visualized using chemiluminescent  
 8 western blot reagents (<sup>5</sup> Thermo Fisher, Waltham, MA, USA), and the images  
 9 were recorded with a chemiluminescence system. Protein bands were  
 10 quantified via the ImageJ software (Rawak Software, Inc., Stuttgart, Germany).

## 1 Cell Counting Kit-8 (CCK-8) assays

2 Human normal hepatocytes (L-02) were purchased from Shanghai Gaining  
3 Biotechnology (China) and cultivated in RPMI-1640 medium (Gibco, Waltham,  
4 MA, USA) augmented with foetal bovine serum (10%), streptomycin (100  
5 µg/mL), and penicillin (100 U/mL) at 37 °C, and in 5% CO<sub>2</sub>. L-02 cells (8000  
6 cells/well) were cultivated in the 96-well plates. Once the cells completely  
7 adhered to the plates, different doses of NaAsO<sub>2</sub> were introduced to the plates  
8 for 24 h. Lastly, CCK-8 buffer was added to final concentrations of 10% (v/v)  
9 and the absorbance was taken via a microplate reader at 450 nm.

## 10 Extracellular lactate production assays

11 A Lactate Production Kit (Njcbio, Nanjing, China) was used to measure the  
12 amount of lactate released into the culture medium. The absorbance was read  
13 at 530 nm by using an ultraviolet–visible spectrophotometer.

## 14 Statistical analysis

15 The acquired data were depicted as the mean ± SEM. All the statistical  
16 assessments were conducted via the GraphPad Prism 9 (GraphPad Software,  
17 Inc., San Diego, CA, USA). For inter-group differences, a two-tailed Student's  
18 t-test was applied. Statistically significant values were set as  $P < 0.05$ .

## 19 Results

## 1    **Effects of RA on NASH at the transcriptome level**

2    According to the early study, the RA-30 group (30 mg/kg RA) showed  
3    alleviation of NASH signs, which was similar to that exhibited by the positive  
4    control GS-0976 group [16]. Therefore, primary hepatocytes isolated from the  
5    control group, HFD-induced NASH group, and RA-30 (30 mg/kg RA) group  
6    were used for transcriptomics and proteomics analyses.

7        The yields of primary hepatocytes in the control, NASH, and RA groups  
8    were approximately  $4.5 \times 10^7$ ,  $1 \times 10^7$ , and  $1.44 \times 10^7$  cells/per mouse,  
9    respectively (Supplementary Table 1). The quantity was sufficiently high for  
10    conducting downstream transcriptome or proteome analysis.

11        On average, 11.75 Gb of sequenced nucleotides was obtained from the  
12    primary hepatocytes of each sample, with a genome mapping rate of 97.66%  
13    (Supplementary Table 2).

14        Of these, 3164 genes showed significantly changes between the control  
15    and NASH groups (1678 and 1486 were upregulated and downregulated,  
16    respectively) (Fig. 2A). A significant difference in 1797 genes was observed  
17    between the NASH and RA groups (340 and 1457 genes were upregulated  
18    and downregulated, respectively) (Fig. 2B). Overall, 936 intersecting DEGs  
19    were probably target genes involved in NASH pathogenesis and RA treatment  
20    (Fig. 2C and Supplementary Table 3).

1 For functional classifications, GO analysis was performed for the 936  
2 intersecting DEGs. The top 10 GO terms were focused on, which mainly  
3 included the immune process and the inflammation response (Fig. 2D). The  
4 physiological roles of these DEGs were identified based on the KEGG  
5 analysis. (Fig. 2E). Among the top 10 pathways, 6 pathways (namely, Fc  
6 gamma R-mediated phagocytosis, phagosome, <sup>33</sup>antigen processing and  
7 presentation, and chemokine, Toll-like receptor, and C-type lectin receptor  
8 signaling pathways) were related to the immune system. Moreover, the <sup>39</sup>tumor  
9 necrosis factor (TNF) signaling pathway can trigger multiple intracellular  
10 signals affecting inflammation and immunity. These results are consistent with  
11 those of the GO analysis.

12 According to the comprehensive GO and KEGG analyses, RA might exert  
13 anti-inflammatory effects by regulating the inflammation-inducing immune  
14 response.

15

16 **Fig. 2** An overview of transcriptome and functional enrichment analysis of DEGs. (A-B)  
17 Global gene expression changes of M vs. C (A) and RA vs. M (B) are plotted as volcano  
18 plots. DEGs in red are upregulated, DEGs in green are downregulated, and non-DEGs  
19 are highlighted in gray. (C) Venn diagram of intersecting DEGs of M vs. C and RA vs. M.  
20 (D-E) Top 10 categories for GO biological processes (D) and KEGG pathways (E) of  
21 DEGs depicted by bubble diagrams. The color indicates the Q value, and the size  
22 indicates the gene number of each pathway. C: Control group. M: NASH group. RA: RA-

1 30 group. N = 10 for each group.

## 2 **Network diagram analysis of the transcriptome**

3 The top 10 pathways with the most genes were categorized into two clusters  
4 through KEGG enrichment analysis (Fig. 3A).

5 Cluster 1 primarily comprised the <sup>18</sup>immune system (antigen processing  
6 and presentation, <sup>18</sup>C-type lectin receptor, and chemokine signaling pathway),  
7 metabolic pathway (oxidative phosphorylation), and TNF signaling pathway  
8 related to inflammation and immunity. Cluster 2 included the ribosome, which  
9 may contribute to NASH development, but the mechanism of action of the  
10 ribosome in NASH has still remained unclear [28-30].

11 Both KEGG and GO analyses indicated that the regulation of the  
12 immune/inflammatory response was largely enriched. Therefore, Cluster 1  
13 was selected as the core cluster for identifying hub genes. The STRING tool  
14 was utilized for establishing the PPI network. This network consisted of 125  
15 nodes interacting with each other through 271 edges (Fig. 3B). The DEGs  
16 were enriched in oxidative phosphorylation and formed an independent cluster.  
17 Oxidative phosphorylation is associated with oxidative stress-induced liver  
18 injury [31]. However, RA had no obvious effect on hepatic injury and could not  
19 reverse the decrease in oxidative phosphorylation in the NASH group  
20 (Supplementary Fig. 3) [16]. Therefore, the other cluster containing more  
21 genes was selected and imported into Cytoscape. The top 10 hub genes were

1 identified based on the Degree in cytoHubba: Rous sarcoma oncogene (SRC),  
2 TLR4, Rac family small GTPase 2 (RAC2), TNF, <sup>4</sup>spleen tyrosine kinase (SYK),  
3 phospholipase C gamma 2 (PLCG2), histocompatibility 2 (H2-Eb1), vascular  
4 cell adhesion molecule 1 (VCAM1), vav 1 oncogene (VAV1), <sup>27</sup>and C-X-C motif  
5 chemokine ligand 10 (CXCL10) (Fig. 3C and Supplementary Table 4). Among  
6 these hub genes, TLR4 represents the intersection of metabolism and  
7 immunity, thereby playing a vital role in HFD-induced inflammation. TLR4 also  
8 regulates the expression of the inflammatory cytokine TNF $\alpha$  through the  
9 classical pathway [32-34]. The PLCG2-IP3-Ca<sup>2+</sup> cascade activates TLR4  
10 translocation, and TLR4 mediates the expression of IRF3 regulatory genes  
11 with SYK [35-37]. In addition, CXCL10 plays a crucial role in recruiting  
12 macrophages and is associated with the induction of proinflammatory  
13 cytokines (TNF $\alpha$ , IL-1 $\beta$ ) [38].

14 Hence, hub genes were enriched in TLR4-mediated inflammation, a  
15 process that generally contributes to fatty liver disease and regulates  
16 proinflammatory cytokines expression.

17

18 **Fig. 3** Network analysis of transcriptomics. **(A)** Pathway relation network of the top 10  
19 KEGG pathways in DEGs. **(B)** The PPI network for DEGs in Cluster 1. **(C)** PPI hub genes  
20 ranked by degree in Cytoscape (ver.3.9.0). Node degree is represented by the redness of  
21 the nodes.

## 1    **Effects of RA on NASH at the proteome level**

2    In total, 15958 peptides and 3493 proteins were identified for the DIA  
3    proteomic analysis (Supplementary Table 5). In total, 1118 proteins were  
4    differentially expressed in the NASH versus control comparison. Of these, 958  
5    were upregulated and 160 were downregulated. In comparison with the NASH  
6    group, the RA group exhibited significant changes in 766 proteins (111 and  
7    655 were upregulated and downregulated, respectively). Most proteins  
8    exhibited a smaller fold change in expression between the RA and control  
9    groups, indicating that the overall protein level tended to be normal after RA  
10    treatment (Fig. 4A). In total, 514 intersecting proteins were selected. (Fig. 4B  
11    and Supplementary Table 6).

12        The selected DEPs were assigned to GO categories to determine the  
13    biological processes in which they were involved. These DEPs were mainly  
14    associated with RNA processing and splicing, protein localization, amino acid  
15    metabolism, carbohydrate metabolism, and oxidation–reduction (Fig. 4C). The  
16    top 10 enriched pathways according to the KEGG enrichment study included  
17    carbohydrate metabolism, amino acid biosynthesis, RNA splicing and  
18    transport, and ferroptosis (Fig. 4D). The results of KEGG and GO analyses  
19    were consistent in terms of carbohydrate metabolism, amino acid metabolism,  
20    and RNA splicing. These pathways might be the key pathways for RA in  
21    hepatocytes.



1

2 **Fig. 4** An overview of the proteomics of liver samples from HFD-fed mice and functional  
3 enrichment analysis of DEPs. **(A)** Heatmap displaying protein expression changes.  
4 Downregulated DEPs are shown in blue, and upregulated DEPs are shown in red. **(B)**  
5 Venn diagram of DEPs. **(C-D)** Top 10 categories for GO biological processes **(C)** and  
6 KEGG pathways **(D)** of DEGs depicted by bubble diagrams. The colour indicates the Q  
7 value, and the size indicates the gene number of each pathway. C: Control group. M:  
8 NASH group. RA: RA-30 group. N = 10 per group.

#### 9 **Network diagram analysis of proteomics**

10 Using the same method as previously, the top 10 pathways were selected to  
11 build the KEGG network based on the KEGG enrichment analysis. Two  
12 clusters were created from these paths (Fig. 5A). One cluster was mainly  
13 related to metabolic pathways and biosynthesis of amino acids and antibiotics,  
14 while the other cluster was related to RNA transport and the spliceosome.

15 Due to the fact that the complicated interaction of metabolic pathways in  
16 the liver is the basis of NASH pathogenesis, the metabolism-related module  
17 (Cluster 1) was selected for the protein interaction analysis. Protein  
18 interactions were analyzed using the STRING database. These interactions  
19 indicated that 88 DEPs were functionally linked with each other through 77  
20 edges (Fig. 5B). Based on the degree in Cytoscape software, 10 hub proteins  
21 were selected. These proteins revealed the involvement of proteins

1 associated with glucose metabolism: glucose-6-phosphate isomerase 1  
2 (GPI1), triosephosphate isomerase 1 (TPI1), phosphoglucomutase 2 (PGM2),  
3 transketolase (TKT), aldolase B (ALDOB), HK2, glyceraldehyde-3-phosphate  
4 dehydrogenase (GAPDH), phosphoglycerate kinase 1 (PGK1), glutamic-  
5 oxaloacetic transaminase 1 (GOT1), and fructose-1,6-bisphosphatase (FBP1).

6 These findings indicate that RA might strongly impact glucose metabolism (Fig.  
7 5C and Supplementary Table 7).

8

9 **Fig. 5** Top 10 hub genes of proteomics revealed by network analysis. (A) The pathway  
10 relation network of the top 10 KEGG pathways in DEPs. (B) The PPI network for DEPs in  
11 Cluster 1. (C) PPI hub genes ranked by degree in Cytoscape (ver.3.9.0). Node degree is  
12 represented by the redness of the nodes.

13

#### 14 **Integrative pathway based on proteome and transcriptome data** 15 **analyses**

16 To compare direction-related changes in mRNAs and proteins, 1576 proteins  
17 were identified that had corresponding mRNA data ( $FDR \leq 0.001$ ) in the NASH  
18 versus RA comparison, and their differences (fold change  $\geq 1.5$ ) were  
19 classified according to the direction of change (Fig. 6A and Supplementary  
20 Table 8). (Fig. 6A).

1        Functional enrichment analysis was applied to 154 genes concordant  
2        with decreasing mRNA and protein levels (green group). The GO analysis  
3        revealed that the most enriched processes were the oxidation–reduction  
4        process (response to oxidative stress), carbohydrate metabolism (ethanol  
5        catabolic process and glycolytic process), immune process (antigen  
6        processing and presentation, cellular response to interferon- $\gamma$ ), and protein  
7        transport and folding (Fig. 6B). Notably, according to the KEGG pathway  
8        analysis of the green group (n = 152) (Fig. 6C), glycolysis/gluconeogenesis  
9        was the first among the top 10 pathways ranked by the Q value. This finding  
10        was highly consistent with the proteome results showing that RA could affect  
11        glucose metabolism.

12        The expression patterns of the remaining groups (red, blue, and yellow)  
13        were visualized through a heatmap (Supplementary Fig. 4). Among these,  
14        cytochrome P450 CYP4A14 and CYP4A10 contribute to fatty acid oxidation  
15        [39-42] and their mRNA and protein levels were both greatly increased in the  
16        NASH group, consistent with previous studies [16]. This result indicated that  
17        RA could improve the fatty acid oxidation capacity in mice with NASH.  
18        Moreover, the <sup>25</sup> level of insulin-like growth factor binding protein 2 (IGFBP2) is  
19        correlated with hepatic steatosis inversely[43], and both its genes and proteins  
20        were elevated in the RA group in the present study.

21

1 **Fig. 6** Integrative analysis based on proteome and transcriptome data. **(A)** Comparison of  
2 the expression changes in mRNA and protein. Blue: decreased mRNA and increased  
3 protein levels (n = 9); green: decreased mRNA and protein levels (n = 152); red:  
4 increased mRNA and protein levels (n = 9); yellow: increased mRNA and decreased  
5 protein levels (n = 4). **(B-C)** Top 10 GO biological process categories **(B)** and top 10  
6 KEGG pathways **(C)** of DEPs/DEGs (green group), as depicted by bubble diagrams. The  
7 colour indicates the Q value, and the size indicates the gene number of each pathway. C:  
8 Control group. M: NASH group. RA: RA-30 group. N = 10 per group.

9 Based on the protein and gene expression data, the GO and KEGG  
10 annotations and hub genes in the proteome and transcriptome analyses, and  
11 the correlation results, integrated pathway maps were constructed. Key genes  
12 in the TLR4/AP1 pathway and glycolysis were downregulated. After RA  
13 treatment, TLR4, MyD88, <sup>21</sup>mitogen-activated protein kinase kinase kinase 8  
14 (Map3k8, also named TPL2), mitogen-activated protein kinase 3 (Mapk3, also  
15 known as ERK), and AP1 subunits (c-Fos and c-Jun) were significantly  
16 downregulated (Fig. 7A and Supplementary Fig. 5). The key enzymes for  
17 glycolysis, that is, HK2, HK3, PFKL, PKM, and lactate dehydrogenase (LDHA),  
18 were downregulated in the RA group versus the NASH group (Fig. 7B and  
19 Supplementary Fig. 6).

20 Therefore, the role of RA in improving NASH might be achieved through a  
21 decrease in glycolysis and the TLR4/AP1 pathway.

22

1 **Fig. 7** Integrated KEGG pathway maps. DEGs and DEPs were mapped to the Toll-like  
2 receptor signaling pathway (A) and glycolysis/gluconeogenesis (B) (the change in mRNA  
3 and protein expression is expressed as log2 [fold change]).

#### 4 **Verification of the effect of RA on the TLR4/AP1 pathway**

5 Four key genes of the TLR4/AP1 signaling pathway were examined in primary  
6 hepatocytes: TLR4, MyD88, and AP1 subunits (c-Fos and c-Jun). The mRNA  
7 expression of MyD88, c-Fos, and c-Jun were markedly elevated in the NASH  
8 group relative to the control group (Fig. 8A). Downregulation of TLR4, MyD88,  
9 and AP1 subunits was observed in the RA group relative to the NASH group,  
10 which indicates that a crucial mechanism through which RA might suppress  
11 inflammation is by altering the mRNA expression of genes in the TLR4/AP1  
12 signaling pathway in hepatocytes.

13 Most studies on TLR4 signaling have focused on nonparenchymal cells,  
14 such as Kupffer cells [44]. Therefore, the aboved four key genes were  
15 examined in primary Kupffer cells.

16 In the HFD-induced NASH group, the relative MyD88, c-Fos, and c-Jun  
17 mRNA levels were markedly elevated by 38%, 82%, and 163%, respectively,  
18 than in the control group. RA treatment reversed the increase in MyD88, c-  
19 Fos, and c-Jun mRNA levels and decreased TLR4 mRNA levels by 37% in  
20 comparison with those of the NASH group (Fig. 8B).

21 The RA-regulated TLR4/AP1 pathway was further explored by measuring

1 the protein levels of TLR4, MyD88, <sup>5</sup> c-Fos, phospho-c-Fos, c-Jun, and  
2 phospho-c-Jun. In comparison with the control group, a 34% increase <sup>24</sup> was  
3 observed in the expression of TLR4 and MyD88 ( $P < 0.05$ ), whereas a trend  
4 of increase in <sup>10</sup> c-Jun and c-Fos expression was observed (Fig. 8C and D).  
5 After RA treatment, <sup>2</sup> c-Fos, phospho-c-Jun, and phospho-c-Fos expression  
6 levels decreased by 14%, 23%, and 24% ( $P < 0.05$ ), respectively, and TLR4  
7 expression exhibited a decreasing trend. However, MyD88 and c-Jun  
8 expression remained unchanged. Because of the action of RA, TLR4  
9 expression and AP1 phosphorylation decreased. Thus, RA could reduce  
10 inflammation in HFD-induced mice by modulating the TLR4/AP1 signaling  
11 pathway expression.

12  
13 **Fig. 8** Effect of RA on the TLR4/AP1 pathway. (A-B) mRNA expression of TLR4, MyD88,  
14 <sup>2</sup> c-Jun, and c-Fos in primary hepatocytes (A) and in primary Kupffer cells (B). (C-D) The  
15 protein abundances (C) and protein expression (D) of TLR4, MyD88, <sup>5</sup> c-Fos, phospho-c-  
16 Fos, c-Jun, and <sup>4</sup> phospho-c-Jun in primary Kupffer cells. \* $P < 0.05$ , \*\* $P < 0.01$ , \*\*\* $P <$   
17  $0.001$  vs. the NASH group. C: Control group. M: NASH group. RA: RA-30 group. N = 10  
18 per group.

### 19 Verification of the effect of RA on glycolysis

20 The DEGs/DEPs identified through transcriptomic and proteomic analyses  
21 revealed that key glycolytic enzymes were significantly regulated in the liver

1 (Fig. 7B). The expression of glycolysis-related genes (HK2,6-phosphofructo-2-  
2 kinase (PFKFB3), PKM2, PFKL, and enolase 1 (ENO1)) was relatively  
3 quantified through qPCR. The RA group exhibited significantly decreased  
4 mRNA levels of the aforementioned genes in comparison with the NASH  
5 group, with the mRNA levels of PFKFB3, PKM2, and PFKL distinctly  
6 increased by 452%, 15%, and 188%, respectively, in the NASH group after  
7 the mice were fed a HFD (Fig. 9A).

8 LDHA is predisposed to converting pyruvate into lactate, which is the final  
9 step in glycolysis [45]. LDHA mRNA expression exhibited a decreasing trend  
10 <sup>3</sup> in the NASH group relative to the control group and was substantially  
11 decreased in the RA group by 23% relative to the NASH group ( $P < 0.01$ ).  
12 These data suggested that RA exerts a suppressive effect on glycolysis and  
13 changes LDHA mRNA expression (Fig. 9).

14 Glycolysis regulates the transcription factor ChREBP, which interacts with  
15 Max-like protein (MLX), thereby affecting the expression of lipid synthesis  
16 genes [46]. In this study, the ChREBP and MLX mRNA expression were  
17 significantly increased by 275% and 103%, respectively, in the mice fed a  
18 HFD. In contrast to the NASH group, RA treatment reversed the enhanced  
19 MLX and decreased ChREBP mRNA levels by 37% (Fig. 9A).

20 The aforementioned results were verified through western blotting to  
21 confirm HK2, PKM2, PFKL, and ChREBP expression levels in mouse primary  
22 liver cells. HK2 protein levels were enhanced by 40% after the mice were fed

1 a HFD, whereas PFKL, PKM2, and ChREBP protein levels exhibited an  
2 upwards trend. Following RA treatment, HK2, PKM2, PFKL, and ChREBP  
3 expression decreased to the normal physiological level (Fig. 9B-C).  
4 Consequently, RA inhibited glycolysis and ChREBP to restore inflammation  
5 and lipogenesis in mice with NASH.

6  
7 **Fig. 9** Effect of RA on the key factors involved in glycolysis. (A) The mRNA expression  
8 levels of hepatocyte HK2, PFKFB3, PKM2, PFKL, ENO1, LDHA, ChREBP, and MLX. (B-  
9 C) The protein abundances (B) and protein expression (C) of hepatocyte HK2, PKM2,  
10 PFKL, and ChREBP. <sup>7</sup> $*P < 0.05$ ,  $**P < 0.01$ ,  $***P < 0.001$  vs. the NASH group. C: Control  
11 group. M: NASH group. RA: RA-30 group. N = 10 per group.

### 13 **Effect of RA on arsenic-induced glycolysis *in vitro***

14 To further confirm whether RA acts as an inhibitor of glycolysis, the effect of  
15 RA on arsenic-induced glycolysis in normal liver cells (L-02) was assessed  
16 according to published methods [47, 48].

17 NaAsO<sub>2</sub> (0.2–12.8 μM) exhibited no conspicuous inhibitory effect on L-02  
18 cell growth (Fig. 10A). Lactate production in these cells increased significantly  
19 after treatment with different NaAsO<sub>2</sub> doses for 24 h (Fig. 10B).

20 The extracellular lactate level was enhanced in the NaAsO<sub>2</sub>-treated <sup>26</sup>group  
21 relative to the control group ( $P < 0.001$ ) (Fig. 10C). RA itself had no effect on



lactate production. RA concentrations of 10 and 30  $\mu\text{M}$  were used in the study according to a previous publication [21]. Compared with the  $\text{NaAsO}_2$ -treated group, lactate production in the RA-treated group decreased dose-dependently ( $P < 0.01$ ) (Fig. 10C). These studies revealed that RA reduces  $\text{NaAsO}_2$ -induced lactate production in L-02 cells.

Overall, RA decreased glycolysis to reduce lactate production, thereby alleviating inflammation and excessive lipogenesis.

**Fig. 10** The effect of RA on glycolysis in  $\text{NaAsO}_2$ -treated L-02 cells. (A) Viability of L-02 cells treated with various  $\text{NaAsO}_2$  doses for 24 h. (B) The release of lactate in L-02 cells treated with various  $\text{NaAsO}_2$  doses.  $*P < 0.05$ ,  $**P < 0.01$ ,  $***P < 0.001$  vs. 0  $\mu\text{M}$   $\text{NaAsO}_2$  treatment. (C) L-02 cells release lactate in response to  $\text{NaAsO}_2$  and RA.  $*P < 0.05$ ,  $**P < 0.01$ ,  $***P < 0.001$ . N = 3 per group.

## Discussion

The study provided integrated links of expression patterns between the transcriptome and proteome in primary hepatocytes. These links uncover the detailed anti-NASH mechanism associated with glycolysis and TLR4/AP1 signaling pathways.

Inhibiting the TLR4/AP1 signaling pathway can attenuate hepatic inflammation and fibrosis in mice [49]. In the previous study, RA significantly suppressed inflammatory cytokines (IL-1 $\beta$ , IL-6, and TNF $\alpha$ ) levels in HFD-fed

1 mice [16]. RNA-Seq analysis was conducted in this research to identify  
2 regulatory genes, which revealed that RA possibly suppresses the TLR4/AP1  
3 signaling pathway.

4 Relative to the control group, the mRNA levels of TLR4, MyD88, c-Fos,  
5 and c-Jun were increased in the NASH group. Following RA treatment, the  
6 mRNA levels of these four genes were all decreased distinctly ( $P < 0.01$ ), and  
7 the protein expression levels of c-Fos, phospho-c-Jun and phospho-c-Fos  
8 were significantly decreased ( $P < 0.05$ ) (Fig. 7). Thus, RA decreased TLR4  
9 expression and AP1 phosphorylation. TLR4 and MyD88 protein expression  
10 did not significantly decrease in the RA group in comparison with the NASH  
11 group. These results could be explained on the basis of a previous study that  
12 showed that RA can block TLR4 dimerization and exert anti-inflammatory  
13 effects on pulmonary inflammation [18].

14 Therefore, RA can be reasonably concluded to reduce TLR4 expression  
15 and activation, thereby decreasing the phosphorylation of its downstream  
16 molecules, exhibiting an inhibitory effect on AP1 translocation, reducing  
17 inflammation, and alleviating NASH.

18 ChREBP, a key factor in glucose-mediated regulation of lipogenic genes  
19 expression, plays a vital part in lipid synthesis. This molecule interacts with  
20 MLX and regulates the expression of lipid synthesis genes [50]. This study  
21 demonstrated that ChREBP mRNA and protein levels both decreased in the  
22 RA group relative to the NASH group (Fig. 8). Reducing ChREBP expression

1 decreases the expression of ACC1 and FAS, which are downstream genes  
2 [16]. These genes are linked to NASH development and play a crucial role in  
3 fatty acid synthesis.

4 Furthermore, ChREBP strongly regulates glycolytic and lipogenic  
5 pathways [51]. Glycolytic metabolites can activate ChREBP and cause its  
6 nuclear translocation. Several rate-limiting enzymes, such as HK, PFK, and  
7 PKM, dominate the glycolysis rate. Inhibiting glycolysis can reduce hepatic  
8 steatosis, inflammation, and fibrosis [52, 53]. The results revealed an increase  
9 in both mRNA and protein levels of HK2, PFKM, and PKM in the NASH group.  
10 Conversely, there was a noticeable downregulation of these molecules in the  
11 RA group in comparison with the NASH group (Fig. 8).

12 Therefore, RA might inhibit ChREBP through glycolysis and regulate  
13 genes in relation to fatty acid synthesis.

14 Lactate is one of the pyruvate products formed during glycolysis, and  
15 LDHA is predisposed to converting pyruvate into lactate [45]. Lactate causes  
16 inflammation and lipid accumulation [54, 55]. In this study, RA markedly  
17 suppressed LDHA expression *in vivo* (Fig. 8A) and inhibited lactate release,  
18 which was increased with NaAsO<sub>2</sub> treatment *in vitro* (Fig. 9). Thus, the effects  
19 of RA on lactate production were attributable to the downregulation of LDHA  
20 expression and glycolysis in hepatocytes, which then reduced inflammation  
21 and lipid accumulation in mice.

1 In the liver, ChREBP and SREBP-1c cooperate to induce fatty acid  
2 synthesis [56]. According to the early study results [16, 57], RA could  
3 attenuate triglyceride synthesis through inhibiting the SREBP-1c/SCD1  
4 pathway and activating the AKT/mTOR pathway, which has been implicated in  
5 SREBP activation. The AKT/mTOR pathway promotes the accumulation of the  
6 active form of SREBP1 [58, 59]. Additionally, AKT/mTOR increased the  
7 glycolysis rate [60, 61].

8 In summary, RA regulates inflammation and fatty acid synthesis through  
9 multiple pathways. The TLR4/AP1 and glycolysis pathways are among the  
10 most crucial regulatory pathways, along with the currently known mechanism  
11 of action (Fig. 11).

12

13 **Fig. 11** The proposed mechanism of action of RA on NASH.

14 Black arrows represent the reported pathways, including the TLR4/AP1 signaling  
15 pathway, SREBP1c/SCD1 signaling pathway crosstalk with ChREBP, glycolysis  
16 metabolism, and the AKT/mTOR pathway. Blue arrows represent the reported  
17 mechanisms of RA. Red arrows represent the findings of this study.

18 **Comparisons with other studies and what does the current work add to**  
19 **the existing knowledge**

20 RA efficiently treats metabolic diseases including hyperglycaemia,  
21 hyperlipidaemia, diabetes, and cardiovascular disease [16, 62-64]. However,

1 the possible mechanisms of action of RA need to be further investigated to  
2 support RA development. Using *in vivo* and *in vitro* models, this study  
3 systematically indicated that RA improves NASH by regulating glycolysis and  
4 the TLR4/AP1 signaling pathways. Furthermore, inhibiting glycolysis can  
5 reduce hepatic steatosis, inflammation, and fibrosis [53, 54]. However,  
6 glycolysis-targeting pharmacological agents for NASH treatment are lacking  
7 [4]. The study findings presented a potential therapeutic reagent (RA) and an  
8 attractive novel therapeutic target (glycolysis) for NASH.

#### 9 **Study strengths and limitations**

10 This study integrates preliminary research and establishes a map of the  
11 mechanism of action of RA on NASH. Primary liver cells, as the most crucial  
12 parenchymal cell type in the liver, was selected for transcriptomic and  
13 proteomic studies. This method can more economically and conveniently  
14 elucidate the effects of drugs on the liver and avoid the interference of other  
15 factors. This study had several unresolved issues that require further  
16 investigation. First, whether RA-induced alterations had a direct effect on  
17 nuclear receptors or indirect regulation through relevant adaptor proteins in  
18 addition to TLR4 in the TLR4/AP1 pathway remains unclear. Second, the  
19 present study analyzed the alteration of glycolysis, but how RA regulates the  
20 glycolytic pathway remains unelucidated. Future related studies should focus  
21 on addressing these issues.

## 1   **Conclusions**

2   These findings systematically demonstrate that RA targets signaling pathways,  
3   specifically ameliorating glycolysis and TLR4/AP1 pathways in NASH. This  
4   study broadens the strategies for treating NASH through the manipulation of  
5   glucose metabolism and metabolic inflammation. This study offers new ideas  
6   for analyzing anti-NASH mechanisms of RA at the molecular level and will  
7   likely stimulate further advancements in the pharmaceutical industry.

8

# Rotundic acid improves nonalcoholic steatohepatitis in mice by regulating glycolysis and the TLR4/AP1 signaling pathway

ORIGINALITY REPORT

9%

SIMILARITY INDEX

## PRIMARY SOURCES

|   |                                                                                                                                                                                                                                                                                                                                                                                                                       |                 |
|---|-----------------------------------------------------------------------------------------------------------------------------------------------------------------------------------------------------------------------------------------------------------------------------------------------------------------------------------------------------------------------------------------------------------------------|-----------------|
| 1 | <a href="http://www.frontiersin.org">www.frontiersin.org</a><br>Internet                                                                                                                                                                                                                                                                                                                                              | 39 words — 1%   |
| 2 | <a href="#">Biasin, Valentina, Karolina Chwalek, Jochen Wilhelm, Johannes Best, Leigh M. Marsh, Bahil Ghanim, Walter Klepetko, Ludger Fink, Ralph T. Schermuly, Norbert Weissmann, Andrea Olschewski, and Grazyna Kwapiszewska. "Endothelin-1 driven proliferation of pulmonary arterial smooth muscle cells is c-fos dependent", The International Journal of Biochemistry &amp; Cell Biology, 2014.</a><br>Crossref | 36 words — 1%   |
| 3 | <a href="http://www.mdpi.com">www.mdpi.com</a><br>Internet                                                                                                                                                                                                                                                                                                                                                            | 34 words — 1%   |
| 4 | <a href="http://pubmed.ncbi.nlm.nih.gov">pubmed.ncbi.nlm.nih.gov</a><br>Internet                                                                                                                                                                                                                                                                                                                                      | 32 words — < 1% |
| 5 | <a href="http://link.springer.com">link.springer.com</a><br>Internet                                                                                                                                                                                                                                                                                                                                                  | 28 words — < 1% |
| 6 | <a href="http://docksci.com">docksci.com</a><br>Internet                                                                                                                                                                                                                                                                                                                                                              | 24 words — < 1% |

|    |                                                                                                                                                                                                                                              |                 |
|----|----------------------------------------------------------------------------------------------------------------------------------------------------------------------------------------------------------------------------------------------|-----------------|
| 7  | Lijuan Xue, Keanqi Liu, Caixia Yan, Junling Dun et al. "Schisandra lignans ameliorate nonalcoholic steatohepatitis by regulating aberrant metabolism of phosphatidylethanolamines", Acta Pharmaceutica Sinica B, 2023<br>Crossref            | 18 words — < 1% |
| 8  | www.spandidos-publications.com<br>Internet                                                                                                                                                                                                   | 18 words — < 1% |
| 9  | worldwidescience.org<br>Internet                                                                                                                                                                                                             | 17 words — < 1% |
| 10 | hdl.handle.net<br>Internet                                                                                                                                                                                                                   | 16 words — < 1% |
| 11 | journals.plos.org<br>Internet                                                                                                                                                                                                                | 16 words — < 1% |
| 12 | Maher, Rosemary Eve. "Biomarkers for Inflammatory Lung Disease", The University of Liverpool (United Kingdom), 2023<br>ProQuest                                                                                                              | 15 words — < 1% |
| 13 | Qun Lou, Fuxun Chen, Bingyang Li, Meichen Zhang et al. "Malignant growth of arsenic-transformed cells depends on activated Akt induced by reactive oxygen species", International Journal of Environmental Health Research, 2022<br>Crossref | 15 words — < 1% |
| 14 | s-space.snu.ac.kr<br>Internet                                                                                                                                                                                                                | 15 words — < 1% |
| 15 | Qiu-Yue Jiang, Zhi-Long Lin, Zhuo-Wei Su, Shan Li, Jing Li, Su Guan, Yun Ling, Lei Zhang. "Peptide identification of hepatocyte growth-promoting factor and its                                                                              | 14 words — < 1% |



function in cytoprotection and promotion of liver cell proliferation through the JAK2/STAT3/c-MYC pathway", European Journal of Pharmacology, 2022

Crossref

- 
- |    |                                                                                    |                 |
|----|------------------------------------------------------------------------------------|-----------------|
| 16 | <a href="https://academic.oup.com">academic.oup.com</a><br><small>Internet</small> | 14 words — < 1% |
|----|------------------------------------------------------------------------------------|-----------------|
- 
- |    |                                                                                      |                 |
|----|--------------------------------------------------------------------------------------|-----------------|
| 17 | <a href="https://www.labmedica.com">www.labmedica.com</a><br><small>Internet</small> | 14 words — < 1% |
|----|--------------------------------------------------------------------------------------|-----------------|
- 
- |    |                                                                                                                                                                                                         |                 |
|----|---------------------------------------------------------------------------------------------------------------------------------------------------------------------------------------------------------|-----------------|
| 18 | Shin, Joosun. "Clinical Characterization and Molecular Mechanisms of Dyspnea in Oncology Outpatients Undergoing Chemotherapy", University of California, San Francisco, 2023<br><small>ProQuest</small> | 13 words — < 1% |
|----|---------------------------------------------------------------------------------------------------------------------------------------------------------------------------------------------------------|-----------------|
- 
- |    |                                                                                                                    |                 |
|----|--------------------------------------------------------------------------------------------------------------------|-----------------|
| 19 | <a href="https://topsecretapiaccess.dovepress.com">topsecretapiaccess.dovepress.com</a><br><small>Internet</small> | 13 words — < 1% |
|----|--------------------------------------------------------------------------------------------------------------------|-----------------|
- 
- |    |                                                                                                    |                 |
|----|----------------------------------------------------------------------------------------------------|-----------------|
| 20 | <a href="https://tel.archives-ouvertes.fr">tel.archives-ouvertes.fr</a><br><small>Internet</small> | 12 words — < 1% |
|----|----------------------------------------------------------------------------------------------------|-----------------|
- 
- |    |                                                                                  |                 |
|----|----------------------------------------------------------------------------------|-----------------|
| 21 | <a href="https://www.dianova.com">www.dianova.com</a><br><small>Internet</small> | 12 words — < 1% |
|----|----------------------------------------------------------------------------------|-----------------|
- 
- |    |                                                                                  |                 |
|----|----------------------------------------------------------------------------------|-----------------|
| 22 | <a href="https://www.omicsdi.org">www.omicsdi.org</a><br><small>Internet</small> | 12 words — < 1% |
|----|----------------------------------------------------------------------------------|-----------------|
- 
- |    |                                                                                                                |                 |
|----|----------------------------------------------------------------------------------------------------------------|-----------------|
| 23 | <a href="https://bmccgenomics.biomedcentral.com">bmccgenomics.biomedcentral.com</a><br><small>Internet</small> | 11 words — < 1% |
|----|----------------------------------------------------------------------------------------------------------------|-----------------|
- 
- |    |                                                                                                                                                                                                                                                                                    |                 |
|----|------------------------------------------------------------------------------------------------------------------------------------------------------------------------------------------------------------------------------------------------------------------------------------|-----------------|
| 24 | Chen, Yi?Min, Jin?Fang Zhao, Yong?Lin Liu, Jie Chen, and Rong?Lin Jiang. "Chronic ethanol treatment of human hepatocytes inhibits the activation of the insulin signaling pathway by increasing cytosolic free calcium levels", International Journal of Molecular Medicine, 2015. | 10 words — < 1% |
|----|------------------------------------------------------------------------------------------------------------------------------------------------------------------------------------------------------------------------------------------------------------------------------------|-----------------|

- 
- 25 [cloud-clone.com](#) 10 words — < 1%  
Internet
- 
- 26 [medsci.org](#) 10 words — < 1%  
Internet
- 
- 27 [molecularbrain.biomedcentral.com](#) 10 words — < 1%  
Internet
- 
- 28 [thoracicmedicine.org](#) 10 words — < 1%  
Internet
- 
- 29 [Blanquicett, C.. "Oxidative stress modulates PPAR<sup>α</sup> in vascular endothelial cells", Free Radical Biology and Medicine, 20100615](#) 9 words — < 1%  
Crossref
- 
- 30 [diabetes.diabetesjournals.org](#) 9 words — < 1%  
Internet
- 
- 31 [www.science.gov](#) 9 words — < 1%  
Internet
- 
- 32 [Chen, X.m.. "Colchicine-induced apoptosis in human normal liver L-02 cells by mitochondrial mediated pathways", Toxicology in Vitro, 201208](#) 8 words — < 1%  
Crossref
- 
- 33 [Yongming Sang, Wyatt Brichalli, Raymond R. R. Rowland, Frank Blecha. "Genome-Wide Analysis of Antiviral Signature Genes in Porcine Macrophages at Different Activation Statuses", PLoS ONE, 2014](#) 8 words — < 1%  
Crossref
- 
- 34 [bmccomplementmedtherapies.biomedcentral.com](#) 8 words — < 1%  
Internet

- 
- 35 [dspace.plymouth.ac.uk](https://dspace.plymouth.ac.uk) 8 words — < 1%  
Internet
- 
- 36 [www.antibodies-online.com](https://www.antibodies-online.com) 8 words — < 1%  
Internet
- 
- 37 Tianxiao Duan, Ting Hu, Changyan Wu, Yao-Tsung Yeh, Ju Lu, Qi Zhang, Xiaozhi Li, Wen Jian, Peng Luo. "PINK1/Parkin-mediated mitophagy is involved in NaAsO<sub>2</sub>-induced apoptosis of human hepatic cells through activation of ERK signaling", *Toxicology in Vitro*, 2020 7 words — < 1%  
Crossref
- 
- 38 H. Yang, N. Magilnick, C. Lee, D. Kalmaz, X. Ou, J. Y. Chan, S. C. Lu. "Nrf1 and Nrf2 Regulate Rat Glutamate-Cysteine Ligase Catalytic Subunit Transcription Indirectly via NF- $\kappa$ B and AP-1", *Molecular and Cellular Biology*, 2005 6 words — < 1%  
Crossref
- 
- 39 Jialin Li, Zhihong Huang, Shan Lu, Hua Luo et al. "Exploring potential mechanisms of Suhexiang Pill against COVID-19 based on network pharmacology and molecular docking", *Medicine*, 2021 6 words — < 1%  
Crossref
- 

EXCLUDE QUOTES ON

EXCLUDE BIBLIOGRAPHY ON

EXCLUDE SOURCES

OFF

EXCLUDE MATCHES

OFF
